# Supplementary material
Source: PubMed Central journal article supplement (PMC7573447)
Supplement: IAI.00338-20-s0001.pdf [file IAI.00338-20-s0001.pdf]

# 1 Supplementary Figures

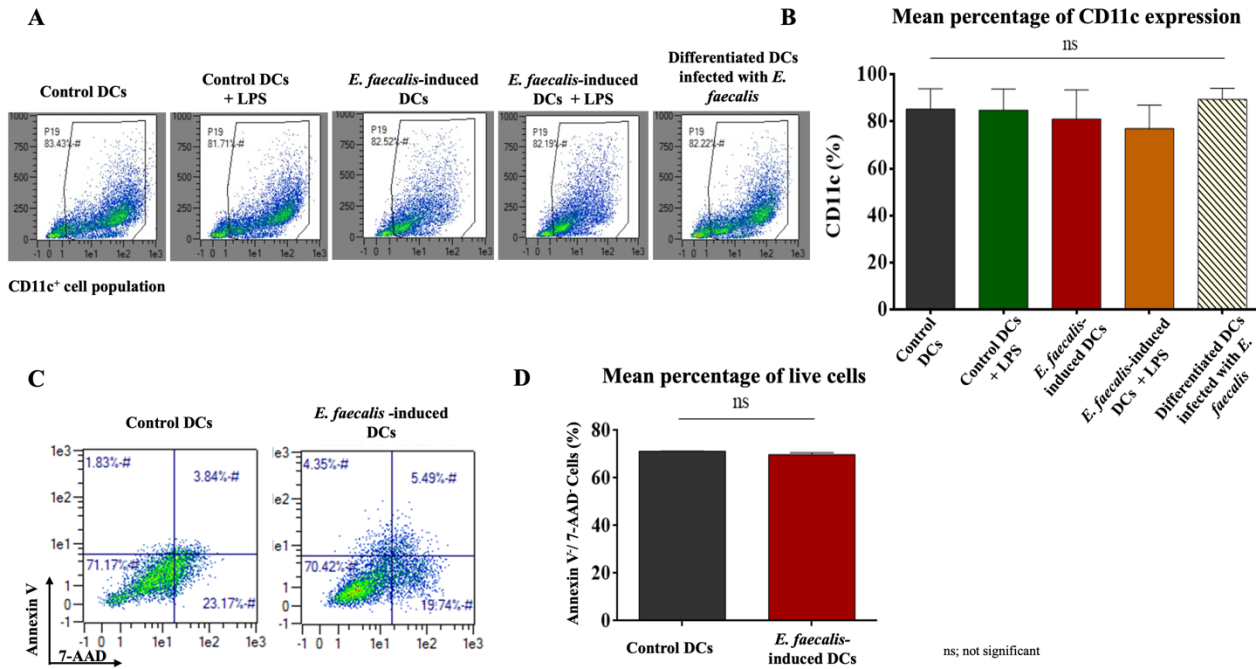

2 **FIGURE S1 DCs differentiation and viability** **A.** Flow cytometry plot showing the percentage  
 3 of CD11c<sup>+</sup> cells induced by GMCSF/IL-4 for 8 days in each group. **B** Bar graph showing the mean  
 4 percentage of CD11c expression between the control and the infection groups. **C.** Flow cytometry  
 5 plot shows 7-AAD<sup>+</sup> cells in the X-axis and Annexin V<sup>+</sup> cells in the Y-axis. The percentage of live  
 6 cell population (cells that are negative for Annexin V and 7-AAD) are found in the lower left  
 7 quadrant of the plot in each group. **D.** Bar graph showing the mean percentage of live cells between  
 8 the control and the infection groups. The experiment was repeated three times in triplicate.

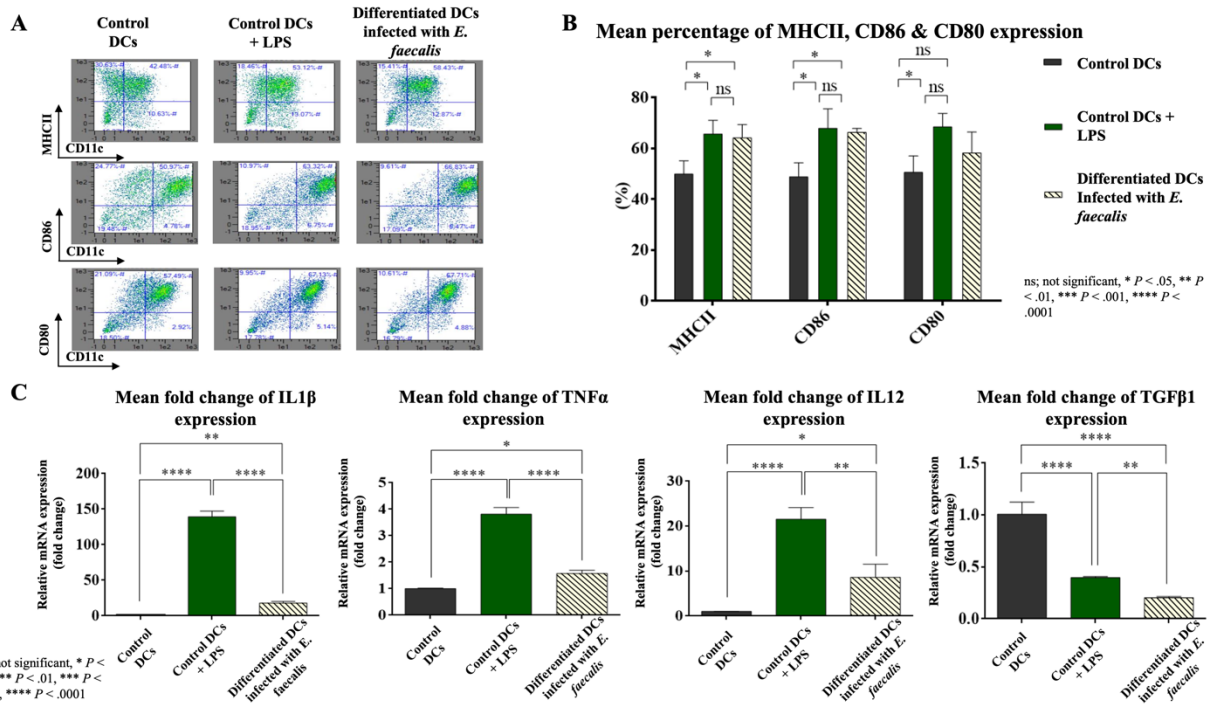

10 **FIGURE S2 Maturation and cytokine induction of control DCs, cocultured with *E. faecalis***  
 11 **after differentiation** **A.** Scattergrams from flow cytometry of (control) DCs treated with LPS or *E.*  
 12 *faecalis* after differentiation with GM-CSF/IL-4. CD11c<sup>+</sup> on the X-axis and MHCII<sup>+</sup> (Top),  
 13 CD86<sup>+</sup> (Middle) or CD80<sup>+</sup> (Bottom) on the Y-axis. **B.** Bar graphs of mean fold change in MHCII<sup>+</sup>,  
 14 CD86<sup>+</sup> and CD80<sup>+</sup>CD11c<sup>+</sup> DCs in the indicated groups. **C.** Bar graphs of mean fold change of  
 15 mRNA expression of IL1 $\beta$ , TNF $\alpha$ , IL12 & TGF $\beta$ 1 by RT-PCR, normalized relative to GAPDH,  
 16 of control DCs, LPS stimulated control DCs and differentiated DCs infected with *E. faecalis*. The  
 17 experiment was repeated three times in triplicate.

18

19
